# Supplementary material for: Effect of Process Conditions on the Properties of Resorcinol-Formaldehyde Aerogel Microparticles Produced via Emulsion-Gelation Method
Source: MDPI journal article supplement (doi:10.3390/polym13152409), 2021-07-22
Supplement: s1 [file s1]

# Supplementary Material: Effect of Process Conditions on the Properties of Resorcinol-Formaldehyde Aerogel Microparticles Produced via Emulsion-Gelation Method

Seeni Meera Kamal Mohamed, Charlotte Heinrich, Barbara Milow

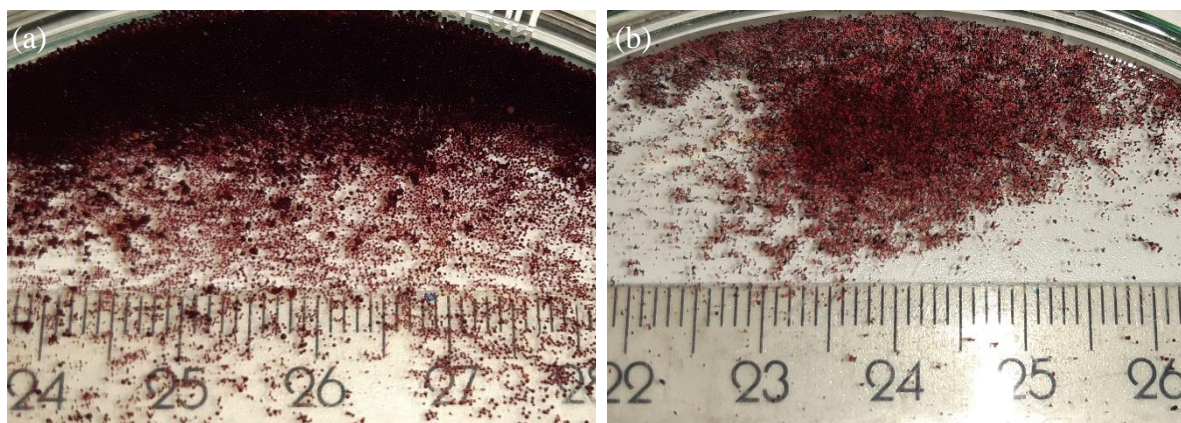

**Figure S1.** Pictures of the RF microparticles produced by emulsion-gelation method using (a) SCD and (b) APD, respectively.

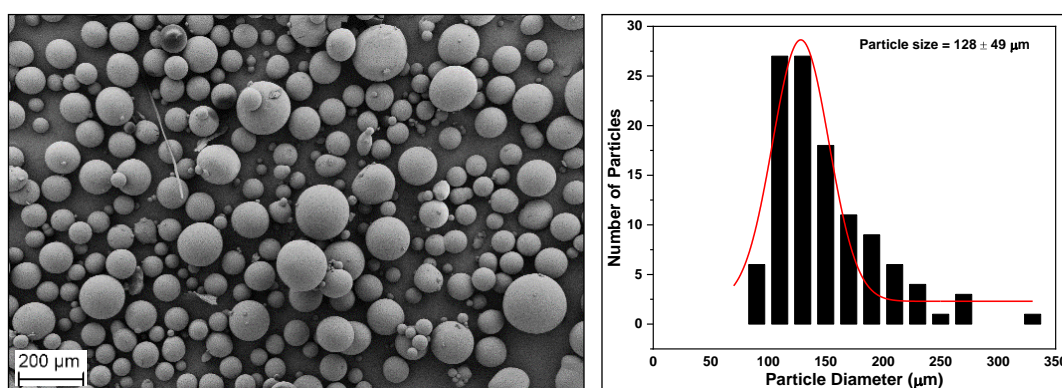

**Figure S2.** SEM image and its particle size distribution of S1-SCD, cured for 14 h.

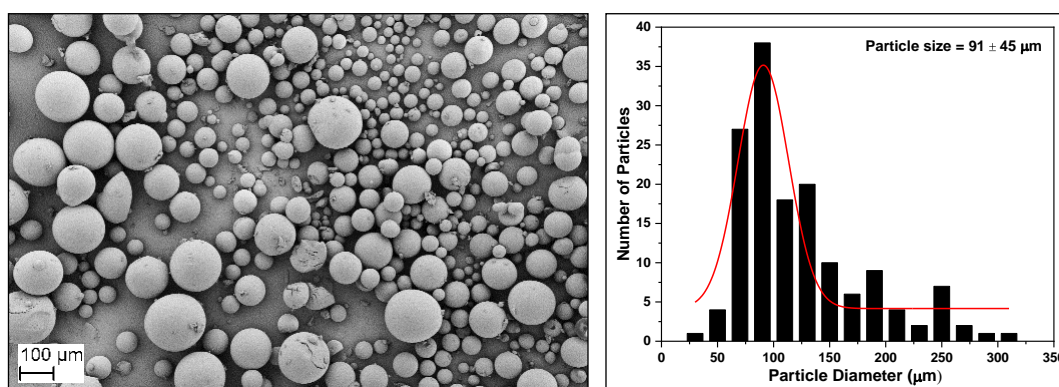

**Figure S3.** SEM image and its particle size distribution of S3-SCD, cured for 48 h.

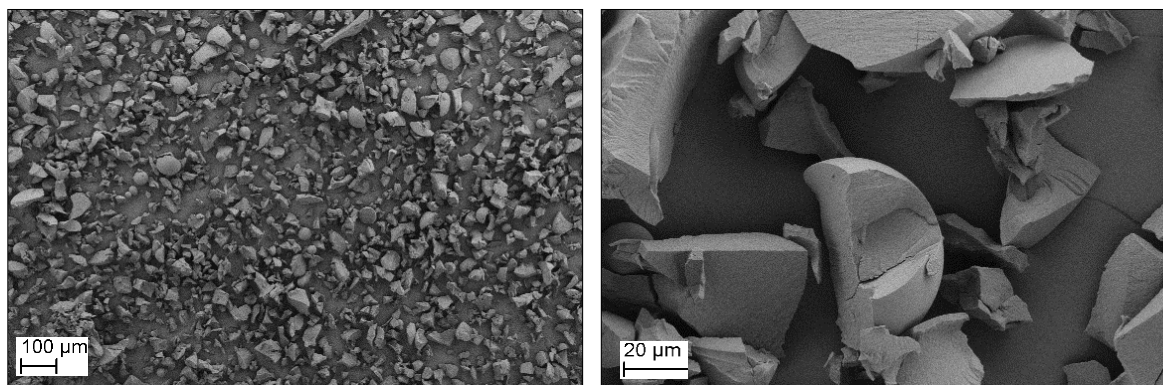

Figure S4. SEM images of RF microparticles cured for 72 h (S4-SCD).

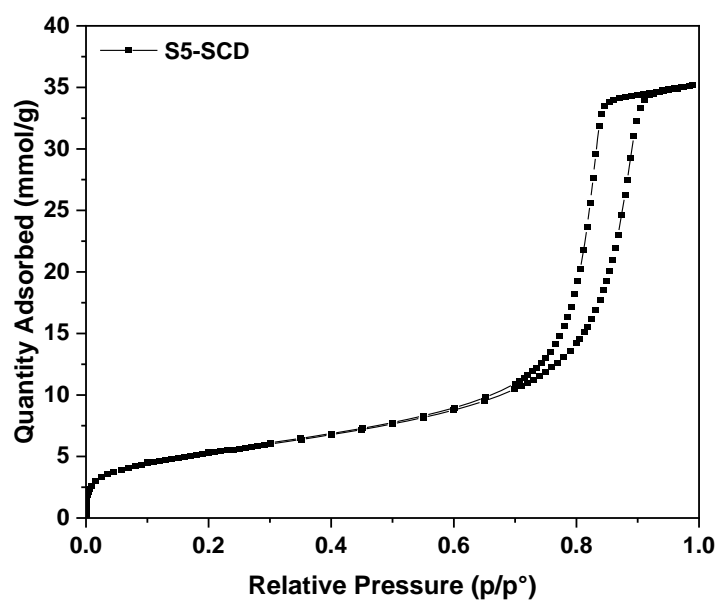

Figure S5. N<sub>2</sub> physisorption isotherm of RF microparticles (S5-SCD) prepared at 500 rpm.

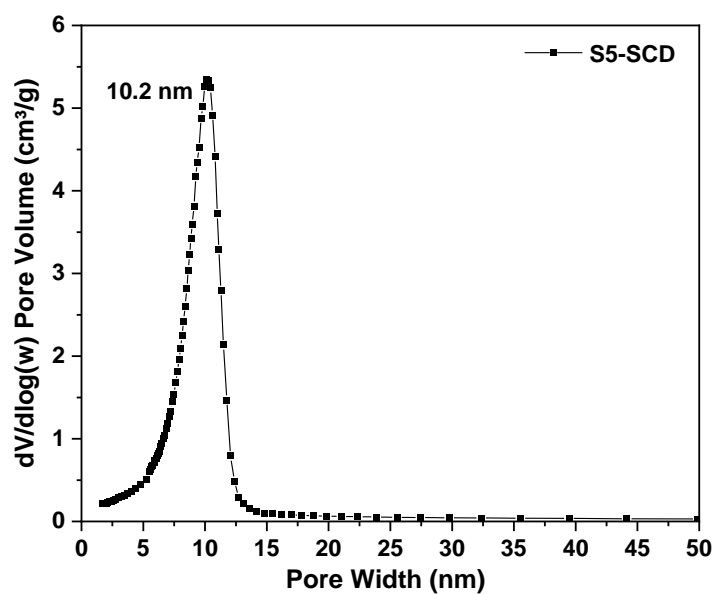

Figure S6. BJH pore size distribution of RF microparticles (S5-SCD) prepared at 500 rpm.

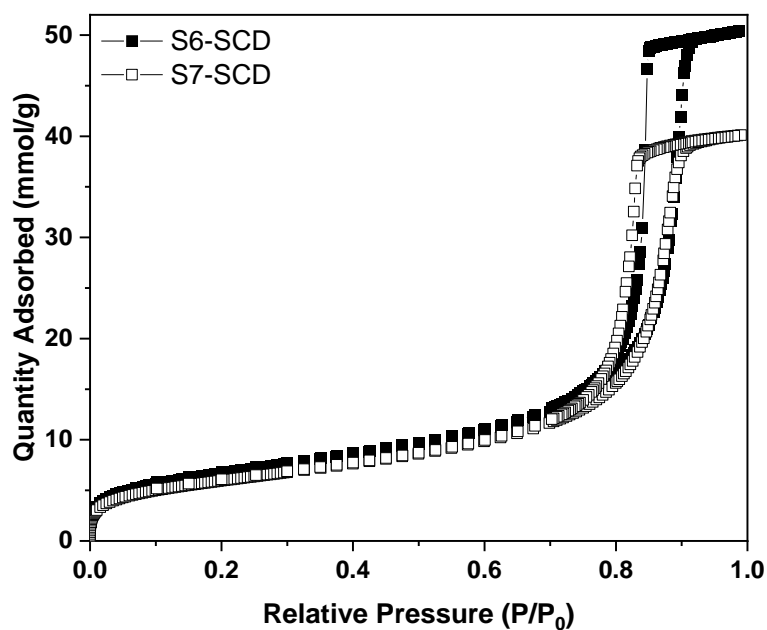

Figure S7. N<sub>2</sub> physisorption isotherms (77K) of the RF microparticles prepared with RF sol: oil ratios of 1:2 and 1:1.

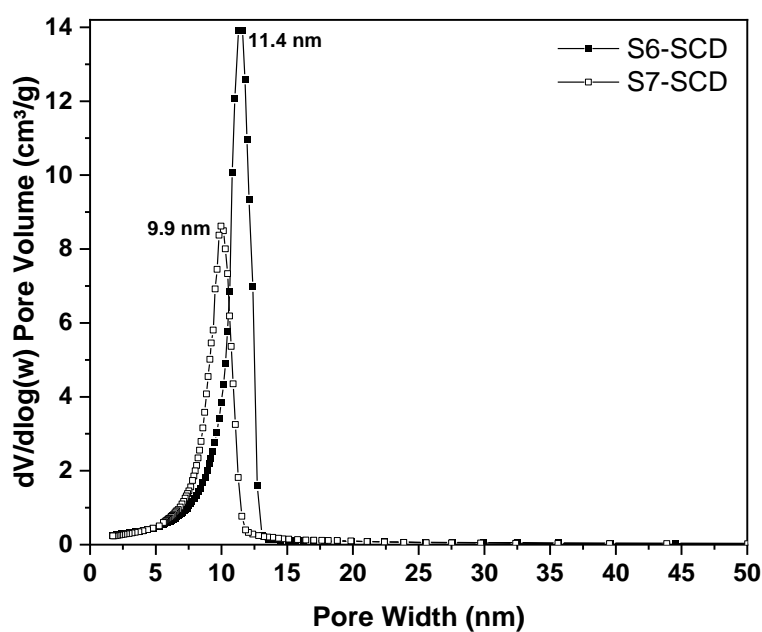

Figure S8. BJH Pore size distribution of RF microparticles prepared with RF sol: oil ratios of 1:2 and 1:1.

Table S1. Comparisons of the previously reported aerogel microparticles with present RF aerogel microparticles.

| Sample Type   | Oil phase     | Size distribution (μm) | Surface area (m <sup>2</sup> /g) | Pore volume (cm <sup>3</sup> /g) | Avg. Pore diameter (nm) |
|---------------|---------------|------------------------|----------------------------------|----------------------------------|-------------------------|
| Alginate [1]  | Paraffin oil  | 7.2-23                 | 330-548                          | 1.7-5.9                          | -                       |
| Cellulose [2] | Paraffin oil  | 5-20                   | 250-350                          | -                                | -                       |
| Silica [3]    | Edible oil    | 5                      | 796                              | -                                | 9.2                     |
| Starch [4]    | Rapeseed oil  | 25-270                 | -                                | -                                | -                       |
| Starch [5]    | Vegetable oil | 215-1226               | 34-120                           | 0.18-0.32                        | -                       |

|                       |               |          |         |             |            |
|-----------------------|---------------|----------|---------|-------------|------------|
| Polyimide[6]          | Silicone oil  | 200-1000 | 360-484 | -           | -          |
| Silica [7]            | Hexane        | 300      | 853     | 2.15        | 16         |
| RF [8]                | Cyclohexane   | 10-80    | -       | -           | -          |
| RF [9]                | Paraffin oil  | 77-158   | 16-78   | -           | -          |
| MF* [10]              | Dodecane      | 20-200   | 200     | 0.12-0.27   | 4-12       |
| Carbon (from RF) [11] | Peanut oil    | 30-1000  | 250-650 | 0.1 to 0.4  | 3.1 to 4.7 |
| Carbon (from RF) [12] | Hexamethylene | 2-50     | 414-603 | 0.028-0.432 | 1.43       |
| RF <sup>#</sup>       | Rapeseed oil  | 50-425   | 400-526 | 1.3-1.75    | 10-14      |

\*Melamine-Formaldehyde; <sup>#</sup>Current work.

## References:

1. Gonçalves, V.S.S.; Gurikov, P.; Poejo, J.; Matias, A.A.; Heinrich, S.; Duarte, C.M.M.; Smirnova, I. Alginate-based hybrid aerogel microparticles for mucosal drug delivery. *European Journal of Pharmaceutics and Biopharmaceutics* **2016**, *107*, 160-170, doi:<https://doi.org/10.1016/j.ejpb.2016.07.003>.
2. Druel, L.; Kenkel, A.; Baudron, V.; Buwalda, S.; Budtova, T. Cellulose Aerogel Microparticles via Emulsion-Coagulation Technique. *Biomacromolecules* **2020**, *21*, 1824-1831, doi:10.1021/acs.biomac.9b01725.
3. Gong, Y.; Lei, Y.; Chen, X.; Song, H.; Liu, R. A novel silica aerogel microspheres loaded with ammonium persulfate gel breaker for mid-deep reservoirs. *Journal of Sol-Gel Science and Technology* **2018**, *88*, 105-113, doi:10.1007/s10971-018-4787-7.
4. Baudron, V.; Taboada, M.; Gurikov, P.; Smirnova, I.; Whitehouse, S. Production of starch aerogel in form of monoliths and microparticles. *Colloid and Polymer Science* **2020**, *298*, 477-494, doi:10.1007/s00396-020-04616-5.
5. García-González, C.A.; Uy, J.J.; Alnaief, M.; Smirnova, I. Preparation of tailor-made starch-based aerogel microspheres by the emulsion-gelation method. *Carbohydrate Polymers* **2012**, *88*, 1378-1386, doi:<https://doi.org/10.1016/j.carbpol.2012.02.023>.
6. Teo, N.; Jana, S.C. Surfactant-Free Process for the Fabrication of Polyimide Aerogel Microparticles. *Langmuir* **2019**, *35*, 2303-2312, doi:10.1021/acs.langmuir.8b03841.
7. Yun, S.; Luo, H.; Gao, Y. Superhydrophobic silica aerogel microspheres from methyltrimethoxysilane: rapid synthesis via ambient pressure drying and excellent absorption properties. *RSC Advances* **2014**, *4*, 4535-4542, doi:10.1039/C3RA46911E.
8. Alviso, C.T.; Pekala, R.W.; Gross, J.; Lu, X.; Caps, R.; Fricke, J. Resorcinol-Formaldehyde and Carbon Aerogel Microspheres. *MRS Proceedings* **1996**, *431*, 521, doi:10.1557/PROC-431-521.
9. Mulani, K.; Patil, V.; Chavan, N.; Donde, K. Adsorptive removal of chromium(VI) using spherical resorcinol-formaldehyde beads prepared by inverse suspension polymerization. *Journal of Polymer Research* **2019**, *26*, 41, doi:10.1007/s10965-019-1705-9.
10. Schwarz, D.; Weber, J. Synthesis of mesoporous poly(melamine-formaldehyde) particles by inverse emulsion polymerization. *Journal of Colloid and Interface Science* **2017**, *498*, 335-342, doi:<https://doi.org/10.1016/j.jcis.2017.03.064>.
11. Liu, N.; Zhang, S.; Fu, R.; Dresselhaus, M.S.; Dresselhaus, G. Carbon aerogel spheres prepared via alcohol supercritical drying. *Carbon* **2006**, *44*, 2430-2436, doi:<https://doi.org/10.1016/j.carbon.2006.04.032>.
12. Wang, X.; Wang, X.; Liu, L.; Bai, L.; An, H.; Zheng, L.; Yi, L. Preparation and characterization of carbon aerogel microspheres by an inverse emulsion polymerization. *Journal of Non-Crystalline Solids* **2011**, *357*, 793-797, doi:<https://doi.org/10.1016/j.jnoncrysol.2010.11.015>.
